# Supplementary material for: An 8q24 Gain in Pancreatic Juice Is a Candidate Biomarker for the Detection of Pancreatic Cancer
Source: MDPI journal article supplement (doi:10.3390/ijms24065097), 2023-03-07
Supplement: s1 [file s1]

**Supplemental Table S1: in- and exclusion criteria per prospective cohort study.**

| Prospective cohort | Inclusion criteria                                                                                                                                                                                                                                                                                                                                                                                                                                                                                                                                                                                                                                                                                                                                        | Exclusion criteria                                                                                                                                                                                                                                                                                                                                                                                                     |
|--------------------|-----------------------------------------------------------------------------------------------------------------------------------------------------------------------------------------------------------------------------------------------------------------------------------------------------------------------------------------------------------------------------------------------------------------------------------------------------------------------------------------------------------------------------------------------------------------------------------------------------------------------------------------------------------------------------------------------------------------------------------------------------------|------------------------------------------------------------------------------------------------------------------------------------------------------------------------------------------------------------------------------------------------------------------------------------------------------------------------------------------------------------------------------------------------------------------------|
| <b>KRASPanc</b>    | Patients who undergo an EUS for (suspected) PDAC either as part of a diagnostic process or fiducial placement prior to radiotherapeutic treatment.                                                                                                                                                                                                                                                                                                                                                                                                                                                                                                                                                                                                        | Age <18 years                                                                                                                                                                                                                                                                                                                                                                                                          |
| <b>CAPS</b>        | Individuals who, after evaluation by a clinical geneticist, have an estimated 10-fold increased risk of developing PDAC, this includes:<br>(1) Carriers of a gene mutation in <i>CDKN2A</i> or <i>STK11</i> , regardless of the family history of pancreatic cancer<br>(2) Carriers of a gene mutation in <i>BRCA1</i> , <i>BRCA2</i> , <i>p53</i> , or Mismatch Repair Gene with a family history of PDAC in $\geq 2$ family members.<br>(3) Familial PDAC (FPC) kindreds, defined as individuals with at least (1) 2 first-degree relatives (FDR) with PDAC, (2) 3 relatives with pancreatic cancer, either FDR or second degree relative (SDR), or (3) 2 SDR relatives with pancreatic cancer of which at $\geq 1$ was <50 years at time of diagnosis. | Age <18 years, personal history of pancreatic cancer, individuals unable to provide informed consent, severe medical illness, PRSS1 gene carrier, contra-indication for EUS due to anatomic abnormalities/surgery                                                                                                                                                                                                      |
| <b>PACYFIC</b>     | Individuals with a suspected neoplastic pancreatic cyst (either newly or previously diagnosed, or previously operated upon) for which cyst surveillance is warranted, according to the treating physician.                                                                                                                                                                                                                                                                                                                                                                                                                                                                                                                                                | Age <18 years, history of chronic pancreatitis, suspected pseudocyst (simple, thin-walled cyst that developed in the course of acute pancreatitis, as documented by sequential imaging studies), suspected serous cystadenoma (typical microcystic lesion with lobulated outlines, a calcified central scar and/or cyst fluid CEA levels < 5ng/ml), Von Hippel-Lindau disease, and limited life expectancy (<2 years). |

**Supplemental Figure S1: H&E staining of tumor slides showing the cancer cellularity at time of resection for P1 (A; PC), P3 (B; PC) and P4 (C-D; HGD).** No slide was available of P2 at time of writing. PC = pancreatic cancer; HGD = high-grade dysplasia.

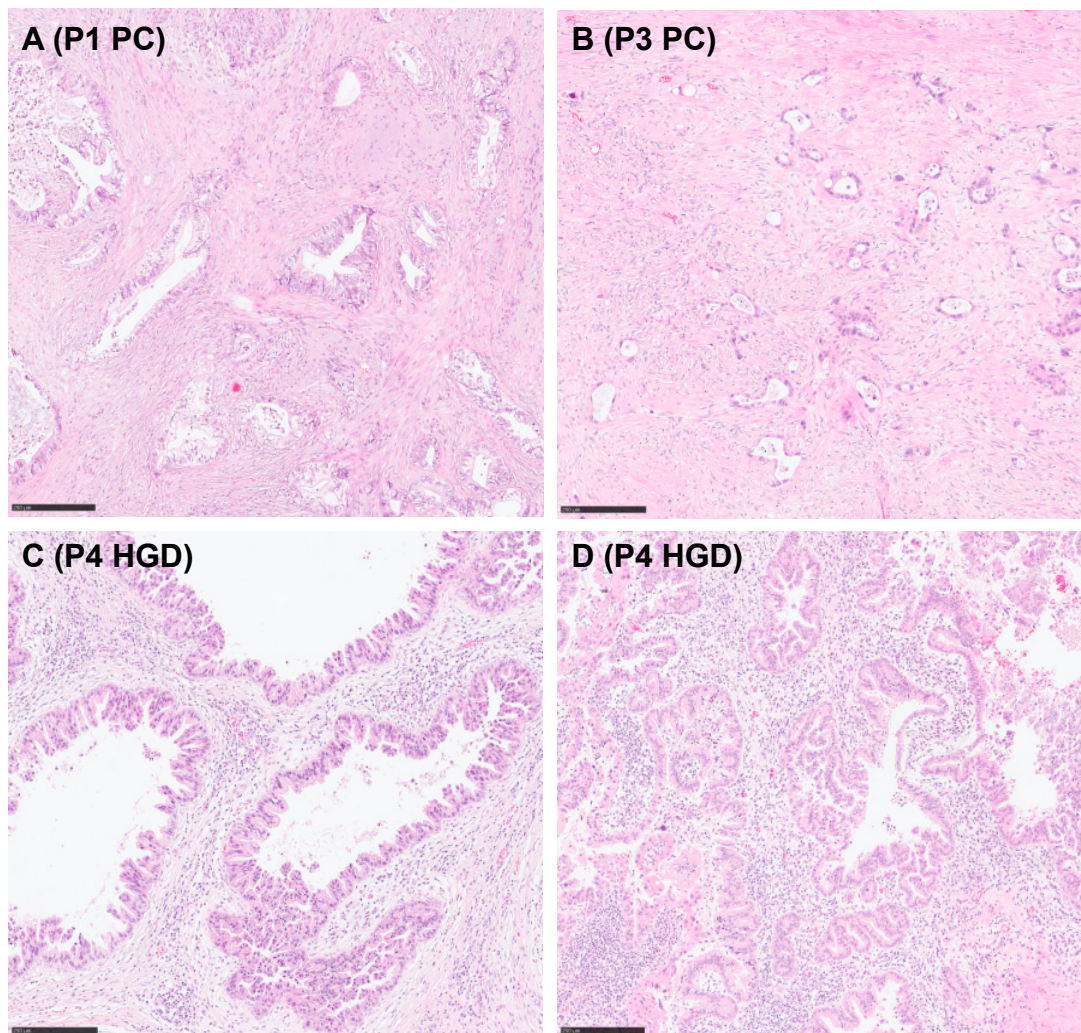

#### A. Wisecondor images

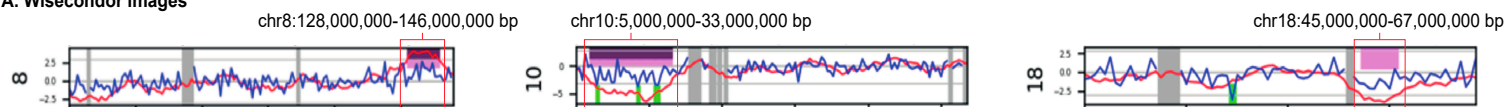

#### B. Chromosome 8

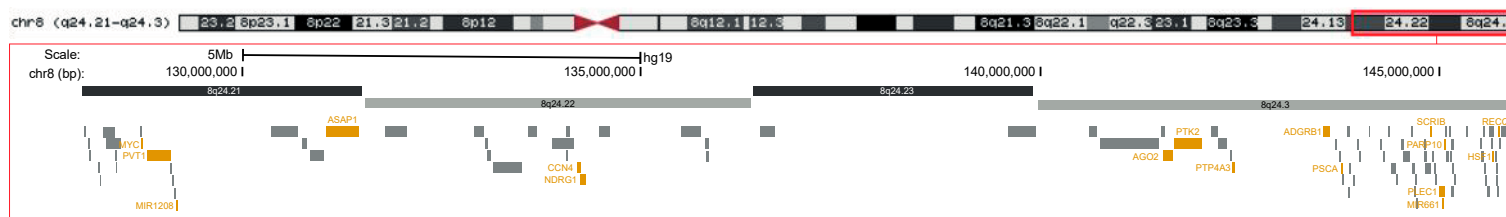

#### C. Chromosome 10

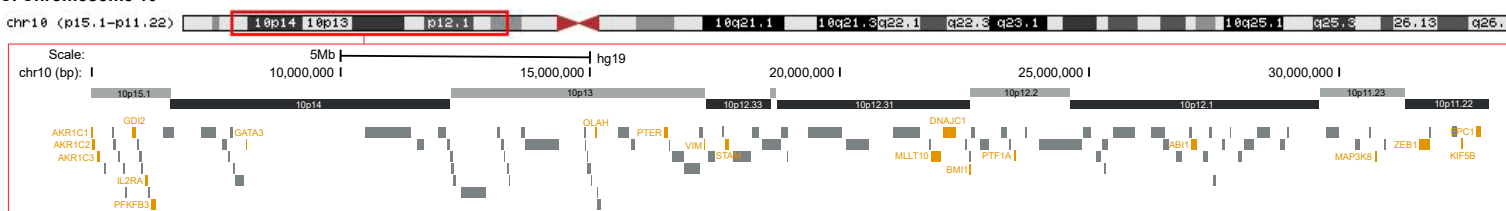

#### D. Chromosome 18

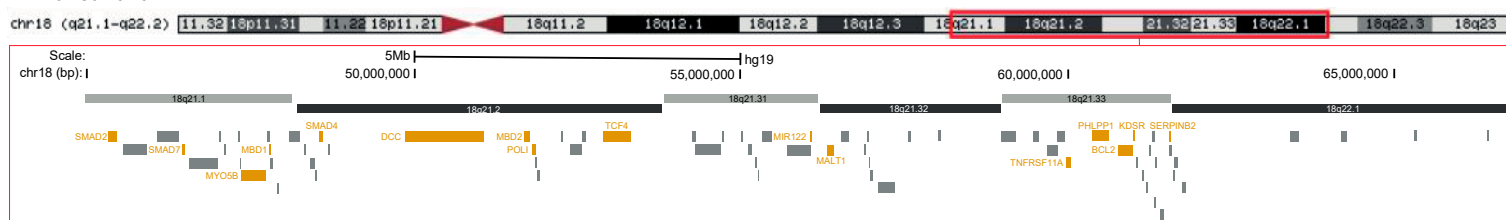

**Supplemental Figure S2: An overview of copy number variations seen in the 8q subgroup and genes located on the aberrant segments. A.** Snapshot of the Wisecondor images showing an 8q gain and 10p loss and 18q loss. Aberrant segments are marked with a red box. Purple = significant copy number variations called by the software. Pink = copy number variations of uncertain significance. **B-C** Genes located on the aberrant chromosome segments. Yellow = genes associated with cancer development according to previous literature.

### A. Wisecondor images

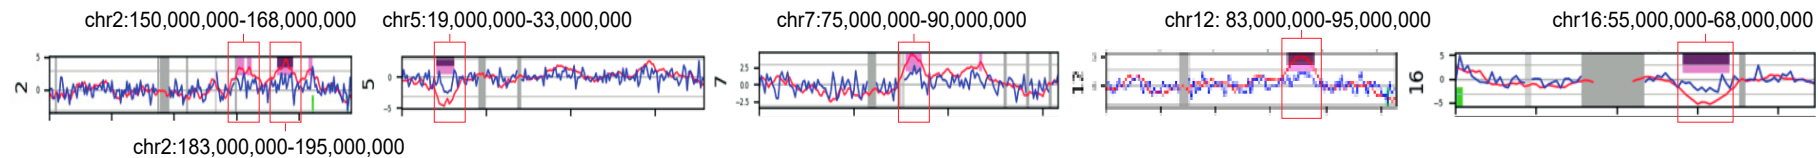

### B. Chromosome 2

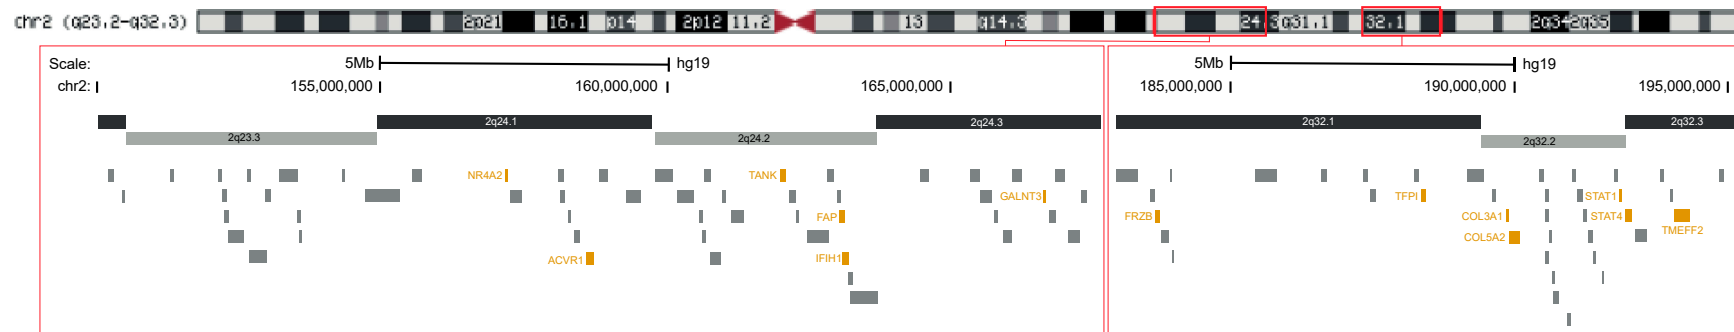

### C. Chromosome 5

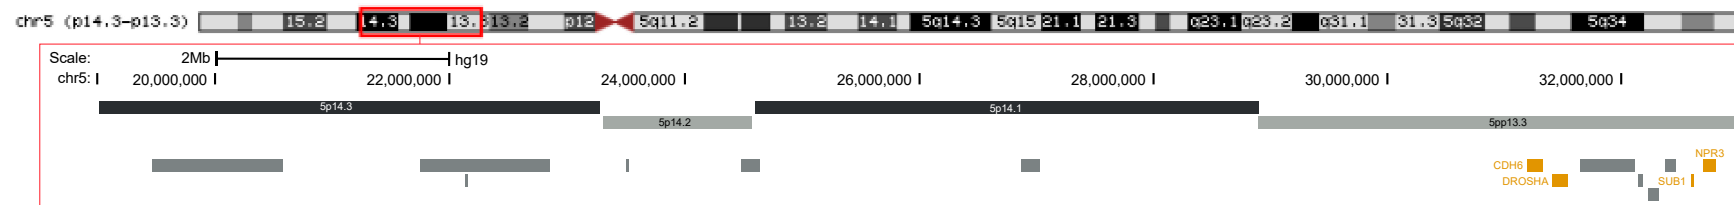

**Supplemental Figure S3: An overview of copy number variations seen in the 2q-5p subgroup and genes located on the aberration segments. A.** Snapshot of the Wisecondor images showing a 2q gain and 5p loss (with or without 7q gain, 12q gain or 16q loss). Aberrant segments are marked with a red box. Purple = significant copy number variations called by the software. Pink = copy number variations of uncertain significance. **B-F** Genes located on the aberrant chromosome segments. Yellow = genes associated with cancer development according to previous literature.

#### D. Chromosome 7

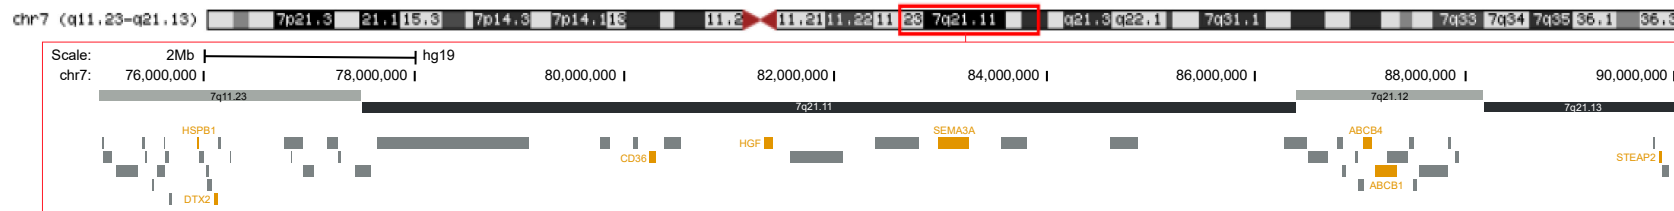

#### E. Chromosome 12

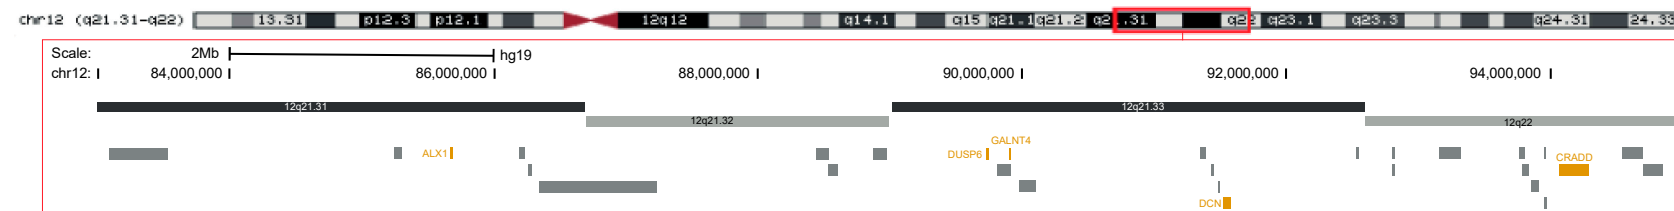

#### F. Chromosome 16

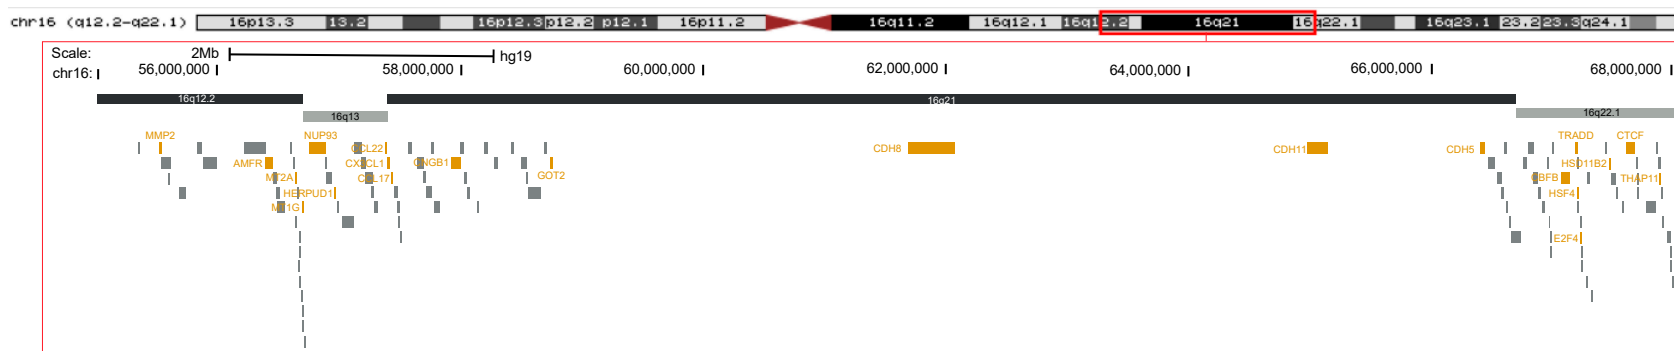

**Supplemental Figure S3: An overview of copy number variations seen in the 2q-5p subgroup and genes located on the aberration segments. A.** Snapshot of the Wisecondor images showing a 2q gain and 5p loss (with or without 7q gain, 12q gain or 16q loss). Aberrant segments are marked with a red box. Purple = significant copy number variations called by the software. Pink = copy number variations of uncertain significance. **B-F** Genes located on the aberrant chromosome segments. Yellow = genes associated with cancer development according to previous literature.
